# Supplementary material for: Processing-Structure-Properties Relationships of Glycerol-Plasticized Silk Films
Source: Molecules. 2022 Feb 16;27(4):1339. doi: 10.3390/molecules27041339 (PMC8877885; doi:10.3390/molecules27041339)
Supplement: Supplementary file 1 [file molecules-27-01339-s001.zip › molecules-1571423-supplementary.pdf]

## Supporting Information

# Processing-Structure-Properties Relationships of Glycerol-Plasticized Silk Films

Hao Lyu <sup>1,2</sup>, Ziyang Sun <sup>2</sup>, Yang Liu <sup>3</sup>, Xin Yu <sup>2,\*</sup> and Chengchen Guo <sup>2,\*</sup>

<sup>1</sup> School of Materials Science and Engineering, Zhejiang University, Hangzhou, 310027, China

<sup>2</sup> School of Engineering, Westlake University, Hangzhou, Zhejiang Province, 310024, China

<sup>3</sup> Institute of Biomedical Engineering and Health Sciences, Changzhou University, Changzhou, Jiangsu, 213164, China

\* Correspondence: yuxin@westlake.edu.cn; guochengchen@westlake.edu.cn

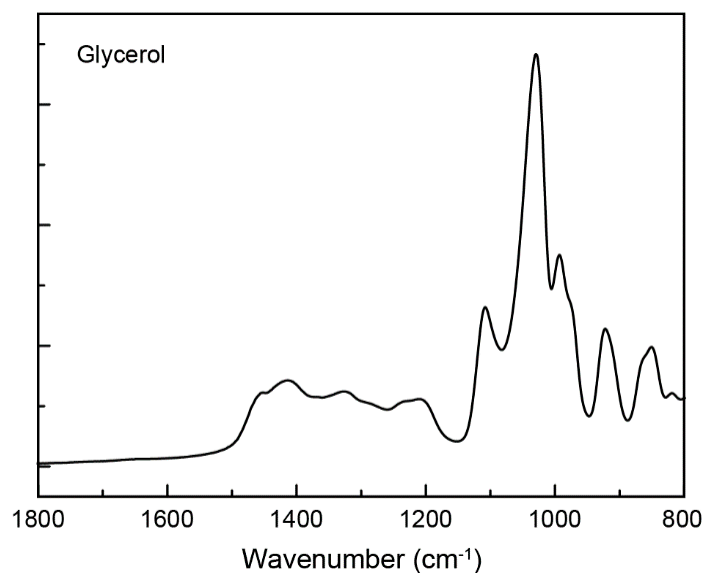

**Figure S1.** FTIR spectra of pure glycerol in the range of 800-1800 cm<sup>-1</sup>.

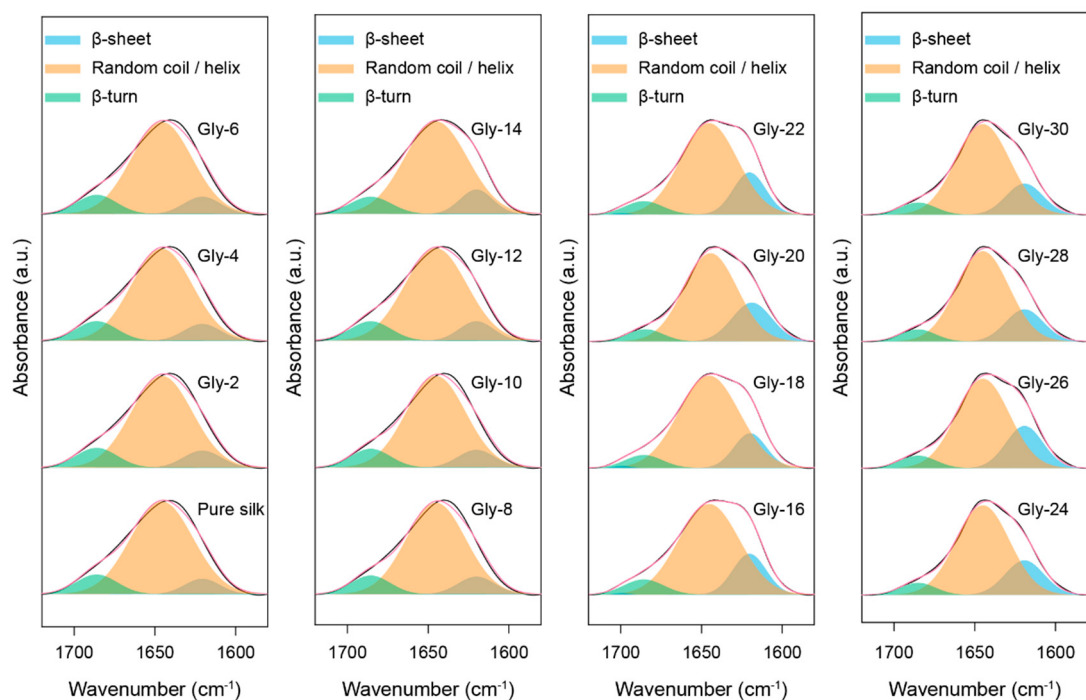

**Figure S2.** The deconvolution of the amide I region for glycerol-plasticized silk films.

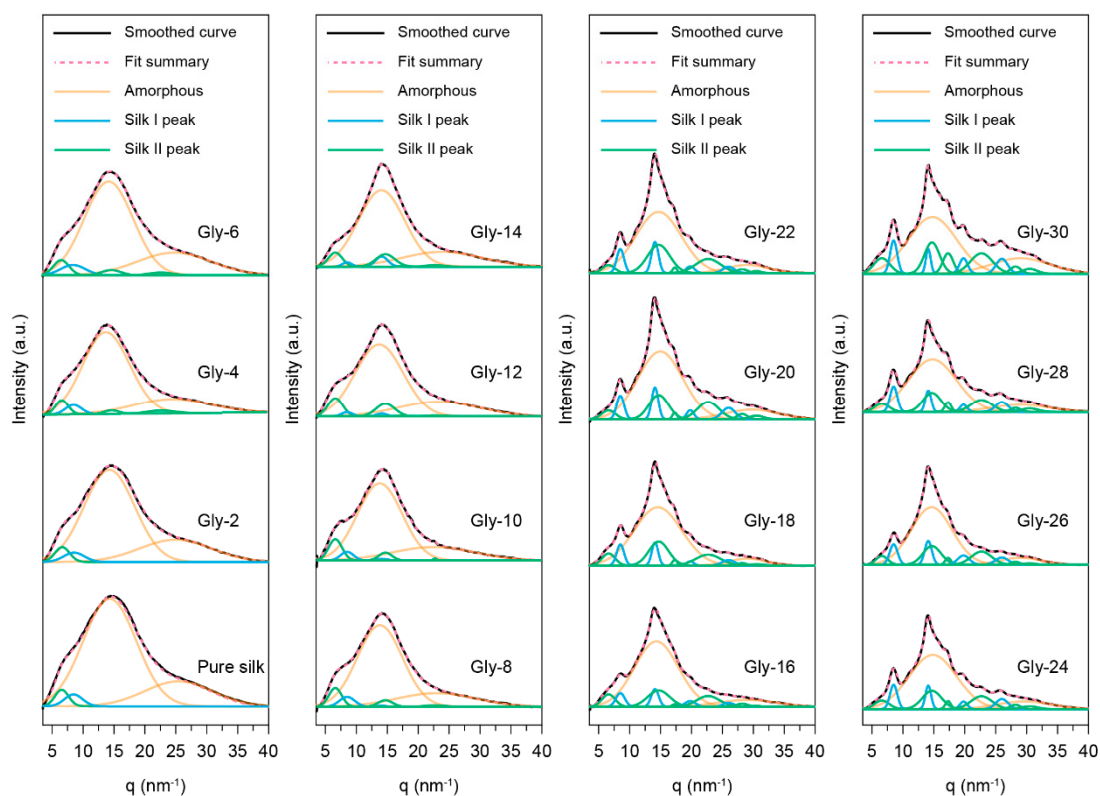

**Figure S3.** The deconvolution and peak fitting process of XRD curve for different silk-glycerol films. The peaks used in the deconvolution include crystalline components ( $6.6 \text{ nm}^{-1}$ ,  $8.5 \text{ nm}^{-1}$ ,  $14.1 \text{ nm}^{-1}$ ,  $14.7 \text{ nm}^{-1}$ ,  $17.3 \text{ nm}^{-1}$ ,  $19.8 \text{ nm}^{-1}$ ,  $22.7 \text{ nm}^{-1}$ ,  $26 \text{ nm}^{-1}$ ,  $28.1 \text{ nm}^{-1}$ ,  $30.5 \text{ nm}^{-1}$ ) and amorphous components ( $\sim 15.0 \text{ nm}^{-1}$ ,  $\sim 28.0 \text{ nm}^{-1}$ ).

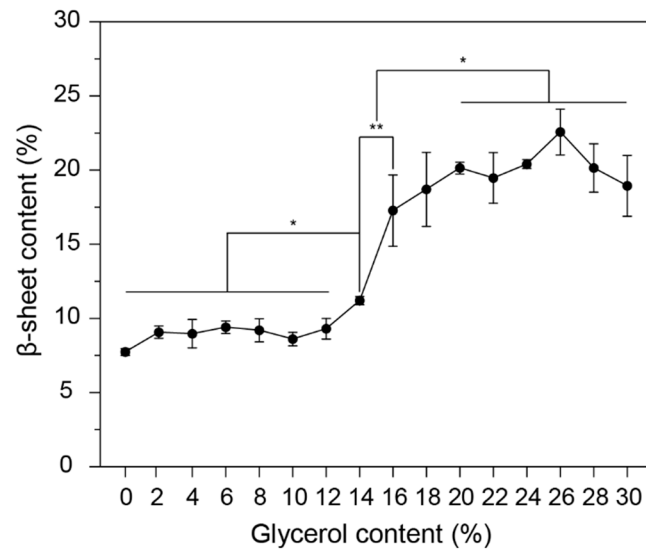

**Figure S4.** Statistical analysis for  $\beta$ -sheet contents of the glycerol-plasticized silk films. \* Significant differences between groups ( $P < 0.05$ ). \*\* Very significant differences between groups ( $P < 0.01$ ). Data represent the  $AV \pm SD$  ( $n=3$ ).
